# Supplementary material for: Acidic and alkaline shock pretreatment to enrich acidogenic biohydrogen producing mixed culture: long term synergetic evaluation of microbial inventory, dehydrogenase activity and bio-electro kinetics
Source: Royal Society of Chemistry journal article supplement (doi:10.1039/c2ra20526b), 2012-01-01
Supplement: c2ra20526b.pdf [file c2ra20526b.pdf]

## Supporting information

### Acidic and alkaline shock pretreatment to enrich acidogenic biohydrogen producing mixed culture: Long term synergetic evaluation of microbial inventory, dehydrogenase activity and bio-electro kinetics

R Kannaiah Goud and S Venkata Mohan\*

Bioengineering and Environmental Centre (BEEC), CSIR-Indian Institute of Chemical Technology (CSIR-IICT), Hyderabad-500 607, India

\* Corresponding author: E-mail: vmohan\_s@yahoo.com; Tel/Fax: 0091-40-27191664

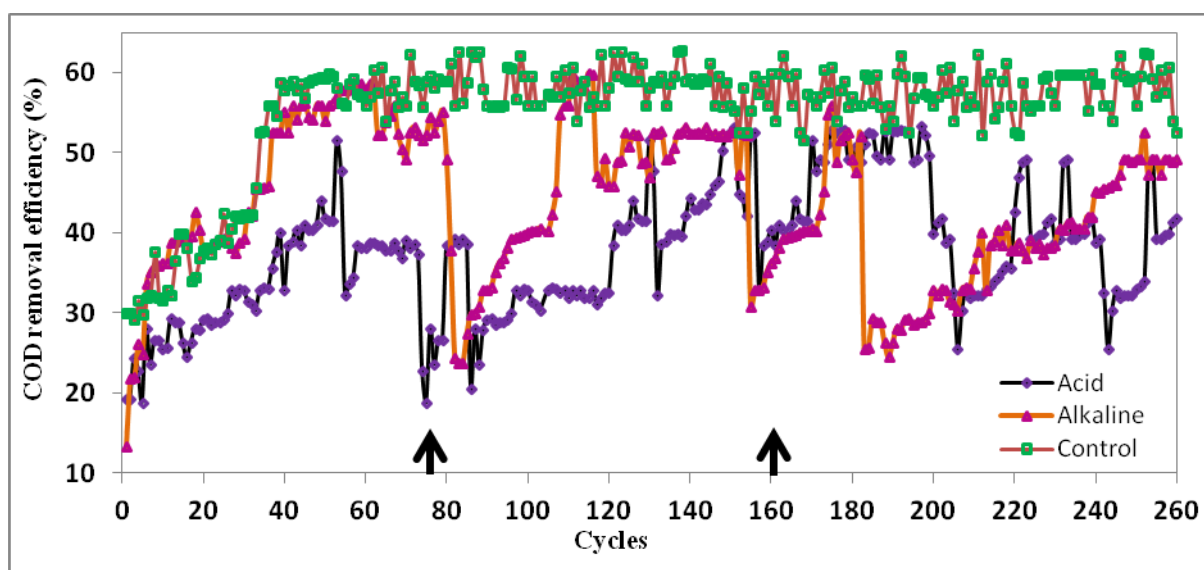

Sfig 1: Substrate degradation pattern as COD removal efficiency, substrate degradation rate and Specific hydrogen yield (SHY) of acid-shock, alkaline-shock and untreated (control) anaerobic inoculum with the function of reactor operation time (↑ indicated application of pretreatment).

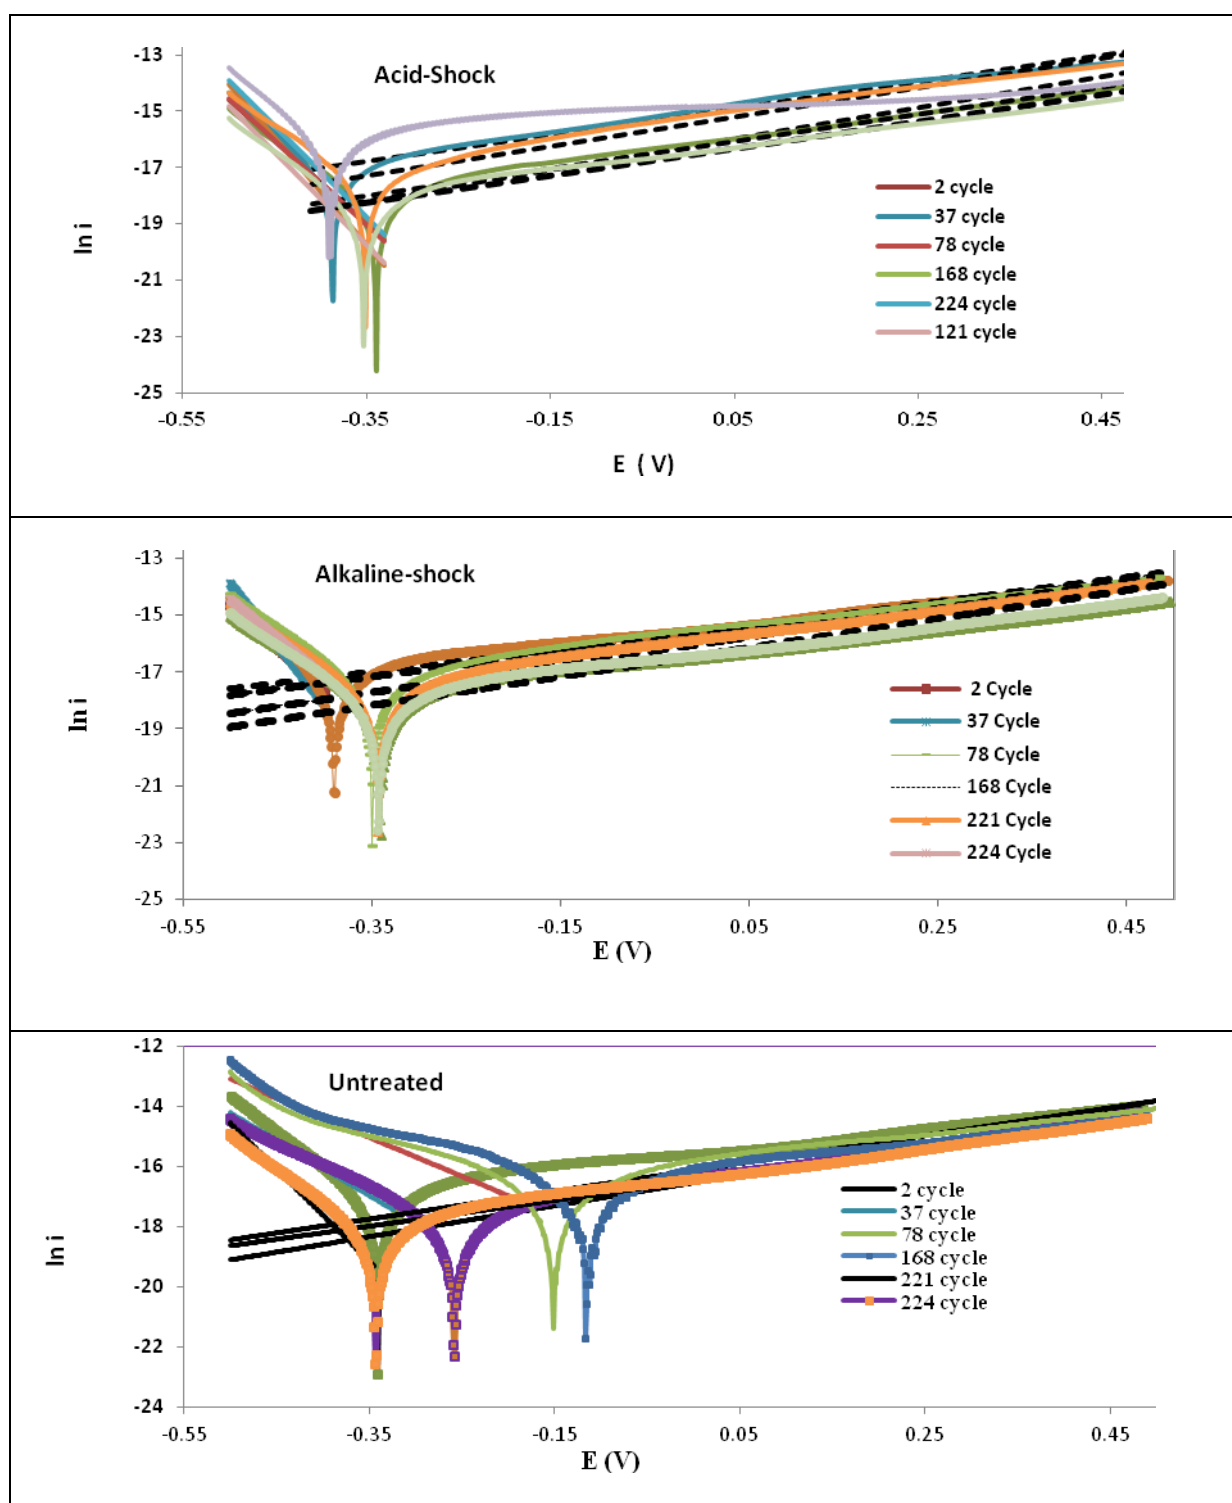

Sfig 2: Tafel analysis with respect to experimental variations studied.

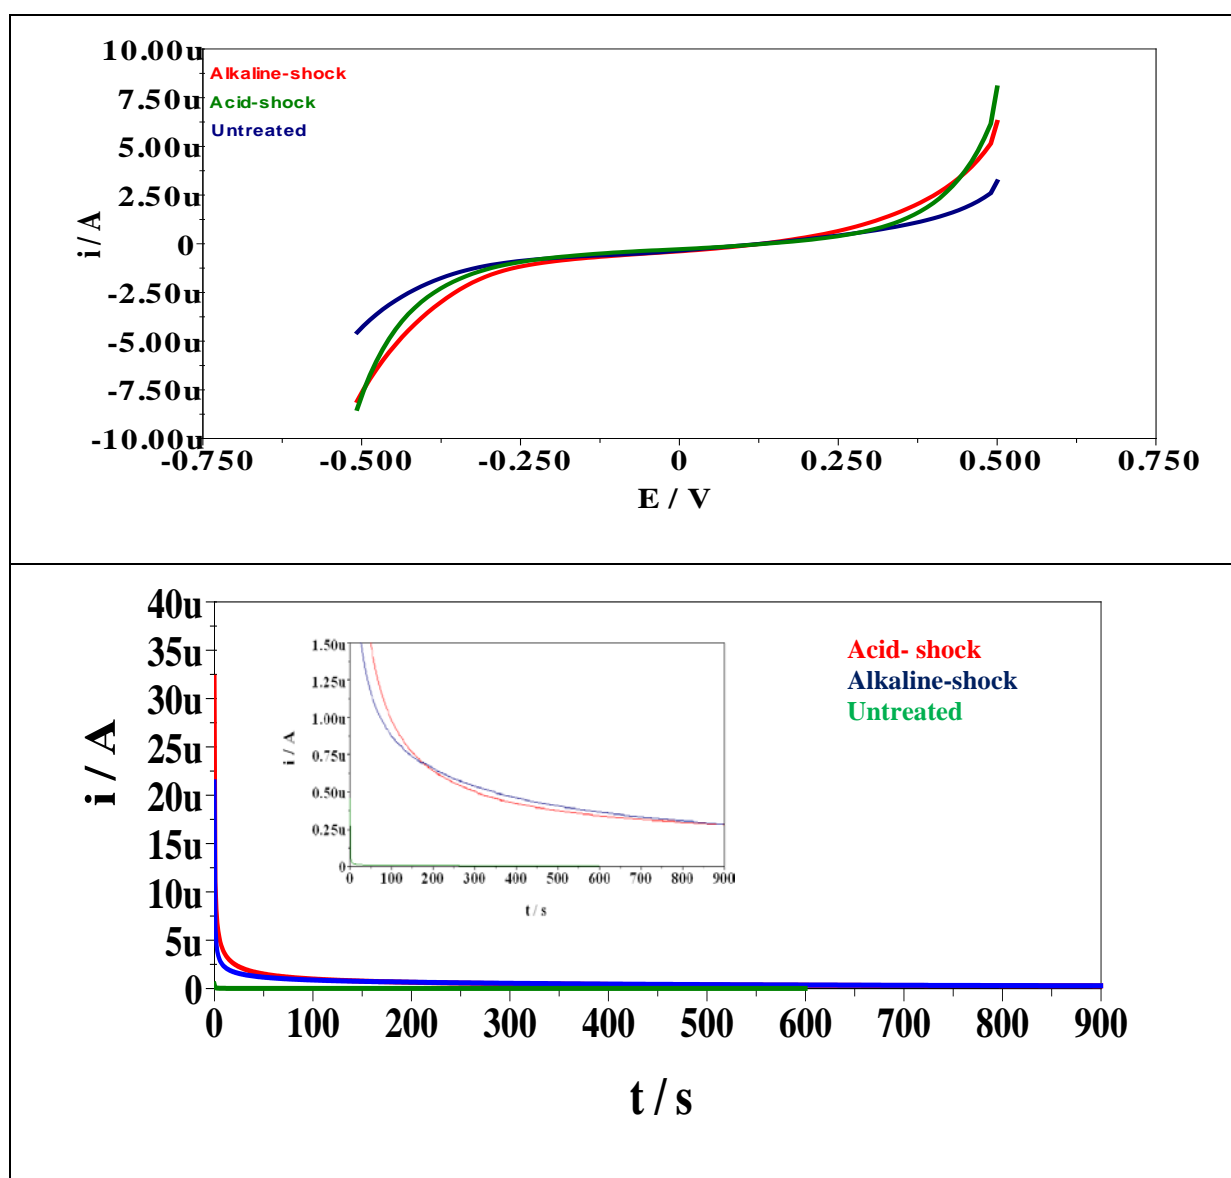

Sfig 3: Extended LSV (polarizing between -0.5 and 0.5 V) and CA analysis (at a constant external potential of 1.2 V) during the operation for acid, alkaline, untreated (Control).
